# Supplementary material
Source: Springer Nature journal article supplement (https://www.springermedizin.de/resource/supplementary/12882_2012_556_MOESM2_ESM.pdf/9453820)

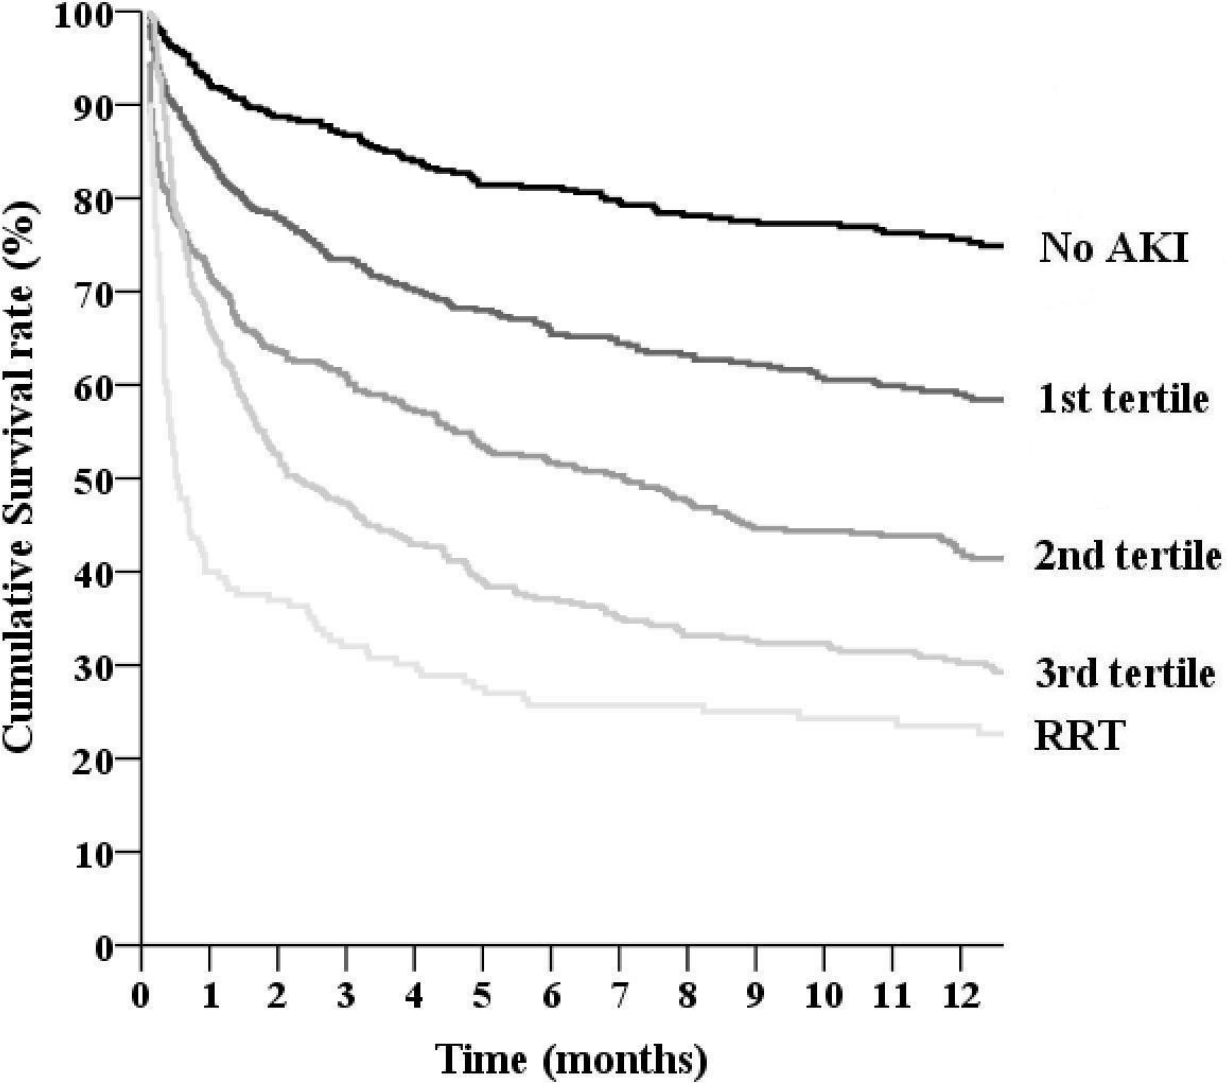

Supplement: MOESM2 [file 9453820]
